# Supplementary material
Source: PubMed Central journal article supplement (PMC7110767)
Supplement: mmc2.pdf [file mmc2.pdf]

**Supplementary table 2: Results of individual sample from Pneumo 4B kit in comparison with bacterial culture.**

| Farm | Pathogens  | <i>M. haemolytica</i> |         | <i>P. multocida</i> |         | <i>H. somni</i> |         |
|------|------------|-----------------------|---------|---------------------|---------|-----------------|---------|
|      | Sample no. | Pneumo 4              | Culture | Pneumo 4            | Culture | Pneumo 4        | Culture |
| A    | 1          | -                     | -       | -                   | -       | +               | +       |
|      | 2          | -                     | -       | +                   | -       | -               | -       |
|      | 3          | +                     | -       | +                   | -       | -               | -       |
|      | 4          | -                     | -       | -                   | -       | -               | -       |
|      | 5          | -                     | -       | -                   | -       | -               | -       |
|      | 6          | -                     | -       | -                   | -       | +               | +       |
|      | 7          | +                     | +       | -                   | -       | -               | -       |
|      | 8          | -                     | -       | -                   | -       | -               | -       |
| B    | 9          | +                     | +       | +                   | +       | -               | -       |
|      | 10         | -                     | -       | +                   | +       | -               | -       |
|      | 11         | -                     | -       | -                   | -       | -               | -       |
|      | 12         | -                     | -       | -                   | -       | -               | -       |
|      | 13         | -                     | -       | -                   | -       | -               | -       |
|      | 14         | -                     | -       | +                   | +       | -               | -       |
|      | 15         | -                     | -       | -                   | -       | -               | -       |
|      | 16         | -                     | -       | -                   | -       | -               | -       |
|      | 17         | -                     | -       | +                   | +       | -               | -       |
|      | 18         | -                     | -       | +                   | +       | +               | +       |
| C    | 19         | -                     | -       | -                   | -       | -               | -       |
|      | 20         | -                     | -       | +                   | +       | -               | -       |
|      | 21         | +                     | -       | +                   | +       | -               | -       |
|      | 22         | -                     | -       | -                   | -       | -               | -       |
|      | 23         | -                     | -       | -                   | -       | -               | -       |
|      | 24         | +                     | +       | +                   | +       | -               | -       |
|      | 25         | +                     | +       | -                   | -       | -               | -       |
|      | 26         | +                     | +       | -                   | -       | -               | -       |
|      | 27         | -                     | -       | +                   | +       | +               | +       |
|      | 28         | +                     | -       | +                   | +       | -               | -       |
| D    | 29         | -                     | -       | -                   | +       | +               | +       |
|      | 30         | -                     | -       | -                   | -       | +               | +       |
|      | 31         | +                     | +       | -                   | -       | -               | -       |
|      | 32         | -                     | +       | -                   | -       | -               | -       |
|      | 33         | -                     | +       | -                   | -       | -               | +       |
|      | 34         | +                     | +       | -                   | -       | -               | -       |
|      | 35         | -                     | -       | -                   | -       | +               | +       |
|      | 36         | +                     | +       | +                   | -       | +               | +       |
|      | 37         | +                     | +       | +                   | -       | +               | -       |
|      | 38         | -                     | -       | -                   | -       | -               | -       |
| E    | 39         | +                     | -       | -                   | -       | -               | -       |
|      | 40         | -                     | -       | +                   | +       | -               | -       |
|      | 41         | +                     | +       | -                   | -       | -               | -       |
|      | 42         | -                     | -       | -                   | -       | -               | -       |

|   |    |   |   |   |   |   |   |
|---|----|---|---|---|---|---|---|
|   | 43 | + | - | + | + | - | - |
|   | 44 | - | - | - | - | - | - |
|   | 45 | - | + | - | - | - | - |
|   | 46 | - | - | - | - | - | - |
| F | 47 | - | - | - | - | - | - |
|   | 48 | - | + | - | - | - | - |
|   | 49 | + | + | + | + | - | - |
|   | 50 | - | + | - | - | - | - |
|   | 51 | + | + | + | + | - | - |
|   | 52 | - | - | - | - | + | + |
|   | 53 | - | - | + | + | + | + |
|   | 54 | + | + | - | - | - | - |
|   | 55 | + | + | - | - | - | - |
|   | 56 | - | - | + | + | + | + |
| G | 57 | - | - | + | + | + | + |
|   | 58 | - | - | - | + | + | + |
|   | 59 | - | - | - | - | + | - |
|   | 60 | - | - | + | + | + | + |
|   | 61 | - | - | - | - | - | + |
|   | 62 | - | - | - | - | + | + |
|   | 63 | - | - | - | - | - | - |
|   | 64 | - | - | + | + | - | - |
|   | 65 | - | - | + | - | + | + |
|   | 66 | - | - | - | - | - | - |
| H | 67 | - | - | - | - | - | - |
|   | 68 | + | + | + | - | - | - |
|   | 69 | - | - | + | + | - | - |

**Supplementary table 2: Results of individual sample from Pneumo 4V kit in comparison with bacterial culture (continue).**

|   |    |   |   |   |   |   |   |
|---|----|---|---|---|---|---|---|
| H | 70 | - | - | + | + | - | - |
|   | 71 | - | - | + | + | - | - |
|   | 72 | - | - | + | - | - | + |
|   | 73 | - | - | - | - | + | + |
|   | 74 | - | - | - | - | + | + |
|   | 75 | - | - | - | - | - | - |
|   | 76 | + | + | + | - | - | - |
| I | 77 | - | - | - | - | - | - |
|   | 78 | - | - | - | - | - | - |
| J | 79 | - | + | - | - | - | - |
|   | 80 | - | + | - | + | - | - |

|   |    |   |   |   |   |   |   |
|---|----|---|---|---|---|---|---|
|   | 81 | - | - | - | - | - | - |
|   | 82 | - | - | - | - | - | + |
|   | 83 | + | + | - | - | - | - |
|   | 84 | - | - | - | + | - | - |
|   | 85 | - | + | - | - | - | - |
|   | 86 | - | + | - | - | + | + |
|   | 87 | - | - | - | - | + | + |
|   | 88 | - | - | - | - | + | + |
|   | 89 | + | + | - | + | + | + |
|   | 90 | - | - | - | - | + | + |
| L | 91 | - | - | - | - | - | - |
|   | 92 | - | + | + | + | - | - |

Supplementary Table 2. CT values of qPCR in the samples

|            | Pneumo 4B             |  |                     |                 |
|------------|-----------------------|--|---------------------|-----------------|
|            | <i>M. haemolytica</i> |  | <i>P. multocida</i> | <i>H. somni</i> |
|            |                       |  |                     |                 |
| Sample No. | Ct                    |  | Ct                  | Ct              |
| 1          | No Ct                 |  | No Ct               | 29,29           |
| 2          | No Ct                 |  | 31,21               | No Ct           |
| 3          | 34,42                 |  | 33,64               | No Ct           |
| 4          | No Ct                 |  | No Ct               | No Ct           |
| 5          | No Ct                 |  | No Ct               | No Ct           |
| 6          | No Ct                 |  | No Ct               | 29,24           |
| 7          | 29,15                 |  | No Ct               | No Ct           |
| 8          | No Ct                 |  | No Ct               | No Ct           |
| 9          | 30,39                 |  | 21,94               | No Ct           |
| 10         | No Ct                 |  | 21,33               | No Ct           |
| 11         | No Ct                 |  | No Ct               | No Ct           |
| 12         | No Ct                 |  | No Ct               | No Ct           |

|    |       |  |       |  |       |
|----|-------|--|-------|--|-------|
| 13 | No Ct |  | No Ct |  | No Ct |
| 14 | No Ct |  | 24,09 |  | No Ct |
| 15 | No Ct |  | No Ct |  | No Ct |
| 16 | No Ct |  | No Ct |  | No Ct |
| 17 | No Ct |  | 29,47 |  | No Ct |
| 18 | No Ct |  | 19,41 |  | 25,68 |
| 19 | No Ct |  | No Ct |  | No Ct |
| 20 | No Ct |  | 18,58 |  | No Ct |
| 21 | 28,78 |  | 24,93 |  | No Ct |
| 22 | No Ct |  | No Ct |  | No Ct |
| 23 | No Ct |  | No Ct |  | No Ct |
| 24 | 23,74 |  | 27,25 |  | No Ct |
| 25 | 26,88 |  | No Ct |  | No Ct |
| 26 | 24,05 |  | No Ct |  | No Ct |
| 27 | No Ct |  | 28,01 |  | 27,03 |
| 28 | 29,42 |  | 24,09 |  | No Ct |
| 29 | No Ct |  | No Ct |  | 27,26 |
| 30 | No Ct |  | No Ct |  | 31,27 |
| 31 | 21,93 |  | No Ct |  | No Ct |
| 32 | No Ct |  | No Ct |  | No Ct |
| 33 | No Ct |  | No Ct |  | No Ct |
| 34 | 22,74 |  | No Ct |  | No Ct |
| 35 | No Ct |  | No Ct |  | 26,19 |
| 36 | 26,67 |  | 27,67 |  | 30,33 |
| 37 | 26,86 |  | 26,68 |  | 28,96 |

|    |                |  |       |  |       |
|----|----------------|--|-------|--|-------|
| 38 | No Ct          |  | No Ct |  | No Ct |
| 39 | 30,69          |  | No Ct |  | No Ct |
| 40 | No Ct          |  | 27,17 |  | No Ct |
| 41 | 25,46          |  | No Ct |  | No Ct |
| 42 | No Ct          |  | No Ct |  | No Ct |
| 43 | 25,35          |  | 21,32 |  | No Ct |
| 44 | No Ct          |  | 39,78 |  | No Ct |
| 45 | No Ct          |  | No Ct |  | No Ct |
| 46 | No Ct          |  | No Ct |  | No Ct |
| 47 | No Ct          |  | No Ct |  | No Ct |
| 48 | No Ct/(36,60)* |  | No Ct |  | No Ct |
| 49 | 25,32          |  | 22,7  |  | No Ct |
| 50 | 38,97          |  | No Ct |  | No Ct |
| 51 | 29,97          |  | 27,29 |  | No Ct |
| 52 | No Ct          |  | No Ct |  | 31,59 |
| 53 | No Ct          |  | 28,89 |  | 29,69 |
| 54 | 35,09          |  | No Ct |  | No Ct |
| 55 | 27,43          |  | No Ct |  | No Ct |
| 56 | No Ct          |  | 30,6  |  | 24,85 |
| 57 | No Ct          |  | 20,02 |  | 25,1  |
| 58 | No Ct          |  | No Ct |  | 26,73 |
| 59 | No Ct          |  | No Ct |  | 25,77 |
| 60 | No Ct          |  | 23,71 |  | 25,53 |
| 61 | No Ct          |  | No Ct |  | No Ct |
| 62 | No Ct          |  | No Ct |  | 27,72 |

|    |       |  |       |  |                   |
|----|-------|--|-------|--|-------------------|
| 63 | No Ct |  | No Ct |  | No Ct             |
| 64 | No Ct |  | 21,76 |  | No Ct             |
| 65 | No Ct |  | 25,57 |  | 31                |
| 66 | No Ct |  | No Ct |  | No Ct             |
| 67 | No Ct |  | No Ct |  | No Ct             |
| 68 | 32,61 |  | 31,46 |  | No Ct             |
| 69 | No Ct |  | 23,43 |  | No Ct             |
| 70 | No Ct |  | 28,67 |  | No Ct             |
| 71 | No Ct |  | 20,72 |  | No Ct             |
| 72 | No Ct |  | 24,94 |  | No<br>Ct/(37.62)* |
| 73 | No Ct |  | No Ct |  | 30,05             |
| 74 | No Ct |  | No Ct |  | 22,47             |
| 75 | No Ct |  | No Ct |  | No Ct             |
| 76 | 22,06 |  | 29,78 |  | No Ct             |
| 77 | No Ct |  | No Ct |  | No Ct             |
| 78 | No Ct |  | No Ct |  | No Ct             |
| 79 | No Ct |  | No Ct |  | No Ct             |
| 80 | No Ct |  | No Ct |  | No Ct             |
| 81 | No Ct |  | No Ct |  | No Ct             |
| 82 | No Ct |  | No Ct |  | No Ct             |
| 83 | 36,10 |  | No Ct |  | No Ct             |
| 84 | No Ct |  | No Ct |  | No Ct             |
| 85 | 24,27 |  | No Ct |  | No Ct             |
| 86 | No Ct |  | No Ct |  | 28,97             |
| 87 | No Ct |  | No Ct |  | 23,38             |

|    |       |  |       |  |       |
|----|-------|--|-------|--|-------|
| 88 | No Ct |  | No Ct |  | 31,17 |
| 89 | 29,42 |  | No Ct |  | 29,62 |
| 90 | No Ct |  | No Ct |  | 26,19 |
| 91 | No Ct |  | No Ct |  | No Ct |
| 92 | No Ct |  | 27,56 |  | No Ct |
