# Supplementary material
Source: PubMed Central journal article supplement (PMC7110767)
Supplement: mmc3.pdf [file mmc3.pdf]

|    |       |     |       |     |  |       |  |       |     |       |       |
|----|-------|-----|-------|-----|--|-------|--|-------|-----|-------|-------|
| 13 | neg   | neg | neg   | neg |  | 23,01 |  | neg   | neg | neg   | pos   |
| 14 | neg   | neg | neg   | neg |  | 18,79 |  | neg   | neg | neg   | pos   |
| 15 | neg   | neg | neg   | neg |  | No Ct |  | neg   | neg | neg   | neg   |
| 16 | 26,63 | neg | neg   | neg |  | No Ct |  | 25,4  | neg | neg   | neg   |
| 17 | 25,36 | neg | neg   | neg |  | No Ct |  | 21,35 | neg | neg   | neg   |
| 18 | 26,53 | neg | neg   | neg |  | No Ct |  | 29,18 | neg | neg   | neg   |
| 19 | 22,55 | neg | neg   | neg |  | No Ct |  | 20,17 | neg | neg   | neg   |
| 20 | neg   | neg | neg   | neg |  | No Ct |  | neg   | neg | neg   | neg   |
| 21 | 33,77 | Neg | Neg   | neg |  | No Ct |  | 32,03 | neg | neg   | neg   |
| 22 | neg   | neg | neg   | neg |  | No Ct |  | neg   | neg | neg   | neg   |
| 23 | 32,41 | Neg | Neg   | neg |  | 39,72 |  | 32,46 | neg | neg   | neg   |
| 24 | 31,8  | Neg | Neg   | neg |  | No Ct |  | 32,34 | neg | neg   | neg   |
| 25 | 24,9  | neg | neg   | neg |  | No Ct |  | 27,36 | neg | neg   | neg   |
| 26 | neg   | neg | neg   | neg |  | No Ct |  | neg   | neg | neg   | neg   |
| 27 | neg   | neg | neg   | neg |  | 19,82 |  | neg   | neg | neg   | pos   |
| 28 | 30,83 | neg | neg   | neg |  | No Ct |  | 32,87 | neg | neg   | neg   |
| 29 | 23,5  | neg | neg   | neg |  | 24,1  |  | 29,95 | neg | neg   | neg   |
| 30 | 27,72 | neg | neg   | neg |  | 28,13 |  | 30,14 | neg | neg   | neg   |
| 31 | 29,38 | neg | neg   | neg |  | 17,82 |  | 26,06 | neg | neg   | 20,19 |
| 32 | 33,71 | neg | neg   | neg |  | 28,26 |  | neg   | neg | neg   | pos   |
| 33 | neg   | neg | neg   | neg |  | 19,31 |  | neg   | neg | 30,57 | neg   |
| 34 | neg   | neg | 33,27 | neg |  | 20,79 |  | neg   | neg | neg   | pos   |
| 35 | neg   | neg | neg   | neg |  | 18,09 |  | neg   | neg | neg   | pos   |
| 36 | neg   | Neg | 28,93 | neg |  | No Ct |  | neg   | neg | 30,79 | neg   |
| 37 | 24,27 | Neg | 35,08 | neg |  | No Ct |  | 24,46 | neg | neg   | neg   |

|    |       |       |       |     |  |       |  |       |     |       |       |
|----|-------|-------|-------|-----|--|-------|--|-------|-----|-------|-------|
| 38 | neg   | neg   | 25,69 | neg |  | No Ct |  | neg   | neg | neg   | pos   |
| 39 | neg   | neg   | 24,92 | neg |  | No Ct |  | neg   | neg | 29,93 | neg   |
| 40 | neg   | neg   | 24,63 | neg |  | 31,35 |  | neg   | neg | 27,26 | neg   |
| 41 | neg   | neg   | 23,2  | neg |  | 28,57 |  | neg   | neg | 28,03 | neg   |
| 42 | neg   | neg   | 23,82 | neg |  | 38,32 |  | neg   | neg | 29,31 | neg   |
| 43 | neg   | neg   | 22,16 | neg |  | No Ct |  | neg   | neg | 24,81 | neg   |
| 44 | neg   | neg   | neg   | neg |  | No Ct |  | neg   | neg | neg   | neg   |
| 45 | neg   | 30,09 | neg   | neg |  | No Ct |  | neg   | neg | neg   | neg   |
| 46 | neg   | neg   | neg   | neg |  | No Ct |  | neg   | neg | neg   | neg   |
| 47 | neg   | neg   | neg   | neg |  | No Ct |  | neg   | neg | neg   | neg   |
| 48 | neg   | neg   | neg   | neg |  | No Ct |  | neg   | neg | neg   | neg   |
| 49 | neg   | neg   | neg   | neg |  | No Ct |  | neg   | neg | neg   | neg   |
| 50 | neg   | neg   | neg   | neg |  | 18,63 |  | neg   | neg | neg   | pos   |
| 51 | neg   | neg   | neg   | neg |  | 25,04 |  | neg   | neg | neg   | pos   |
| 52 | neg   | neg   | neg   | neg |  | 32,42 |  | neg   | neg | neg   | neg   |
| 53 | 20,26 | neg   | 21,23 | neg |  | 18,18 |  | 18,43 | neg | 20,02 | 21,53 |
| 54 | neg   | Neg   | 25,44 | neg |  | 26,69 |  | neg   | neg | 26,94 | 32,35 |
| 55 | neg   | Neg   | 22,62 | neg |  | 19,09 |  | neg   | neg | 22,04 | 21,53 |
| 56 | neg   | neg   | neg   | neg |  | No Ct |  | neg   | neg | neg   | neg   |
| 57 | neg   | neg   | neg   | neg |  | 29,5  |  | neg   | neg | neg   | neg   |
| 58 | neg   | neg   | neg   | neg |  | 22,25 |  | neg   | neg | neg   | pos   |
| 59 | neg   | neg   | neg   | neg |  | 33,49 |  | neg   | neg | neg   | neg   |
| 60 | 24,54 | neg   | neg   | neg |  | No Ct |  | 21,22 | neg | neg   | neg   |
| 61 | 24,13 | neg   | neg   | neg |  | No Ct |  | 23,27 | neg | neg   | neg   |
| 62 | neg   | neg   | neg   | neg |  | 29,31 |  | neg   | neg | neg   | neg   |

|    |     |       |       |     |  |       |  |     |       |       |       |
|----|-----|-------|-------|-----|--|-------|--|-----|-------|-------|-------|
| 63 | neg | neg   | neg   | neg |  | 30,5  |  | neg | neg   | neg   | pos   |
| 64 | neg | neg   | neg   | neg |  | No Ct |  | neg | neg   | neg   | neg   |
| 65 | neg | neg   | neg   | neg |  | 31,06 |  | neg | neg   | neg   | neg   |
| 66 | neg | neg   | neg   | neg |  | 16.31 |  | neg | neg   | neg   | pos   |
| 67 | neg | neg   | neg   | neg |  | No Ct |  | neg | neg   | neg   | neg   |
| 68 | neg | neg   | neg   | neg |  | 27.58 |  | neg | neg   | neg   | pos   |
| 69 | neg | neg   | neg   | neg |  | 23.44 |  | neg | neg   | neg   | pos   |
| 70 | neg | neg   | neg   | neg |  | No Ct |  | neg | neg   | neg   | neg   |
| 71 | neg | neg   | neg   | neg |  | 31.66 |  | neg | neg   | neg   | pos   |
| 72 | neg | neg   | neg   | neg |  | No Ct |  | neg | neg   | neg   | neg   |
| 73 | neg | neg   | neg   | neg |  | 30.15 |  | neg | neg   | neg   | neg   |
| 74 | neg | 27,94 | neg   | neg |  | 23.33 |  | neg | neg   | neg   | pos   |
| 75 | neg | 36,82 | neg   | neg |  | No Ct |  | neg | neg   | neg   | neg   |
| 76 | neg | 20,46 | neg   | neg |  | No Ct |  | neg | 23,37 | neg   | neg   |
| 77 | neg | 29,71 | neg   | neg |  | No Ct |  | neg | 30,92 | neg   | neg   |
| 78 | neg | 29,54 | neg   | neg |  | No Ct |  | neg | 32,72 | neg   | neg   |
| 79 | neg | 20,49 | neg   | neg |  | No Ct |  | neg | 25,08 | neg   | neg   |
| 80 | neg | neg   | neg   | neg |  | 14.34 |  | neg | neg   | neg   | pos   |
| 81 | neg | neg   | neg   | neg |  | 17.34 |  | neg | neg   | neg   | pos   |
| 82 | neg | neg   | 25,94 | neg |  | 19.52 |  | neg | neg   | 29,51 | 22,82 |
| 83 | neg | neg   | neg   | neg |  | 30.42 |  | neg | neg   | neg   | pos   |
| 84 | neg | neg   | 23,24 | neg |  | 23.98 |  | neg | neg   | 23,89 | 28,68 |
| 85 | neg | neg   | neg   | neg |  | 26.08 |  | neg | neg   | neg   | neg   |

\* sample was empty at arrival

\*\* The results of viral pathogens and M. bovis were only reported as a positive or negative. The Ct values were provided in case of viral positive samples due to a special request for comparison .

neg= negative

pos=positive
